# Supplementary material
Source: PubMed Central journal article supplement (PMC8417506)
Supplement: mmc1.pdf [file mmc1.pdf]

**YMTHE, Volume 29**

**Supplemental Information**

**Live-attenuated RNA hybrid vaccine technology  
provides single-dose protection against  
Chikungunya virus**

**Emily A. Voigt, Jasmine Fuerte-Stone, Brian Granger, Jacob Archer, and Neal Van Hoven**

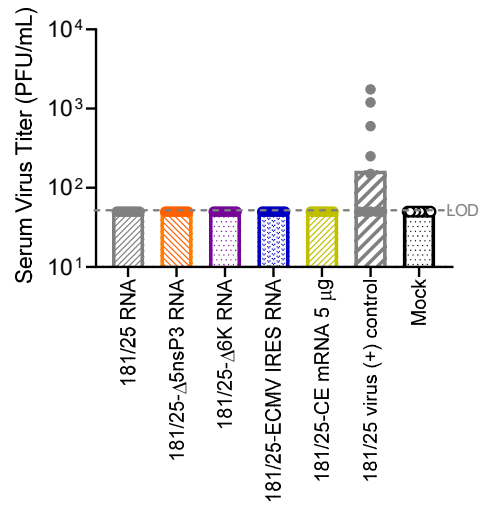

**Figure S1:** Post-vaccination viremia in RNA- and 181/25 attenuated virus-vaccinated C57BL/6 mice. Serum samples were taken from mice three days post-vaccination and assayed for detectable viremia by plaque assay.

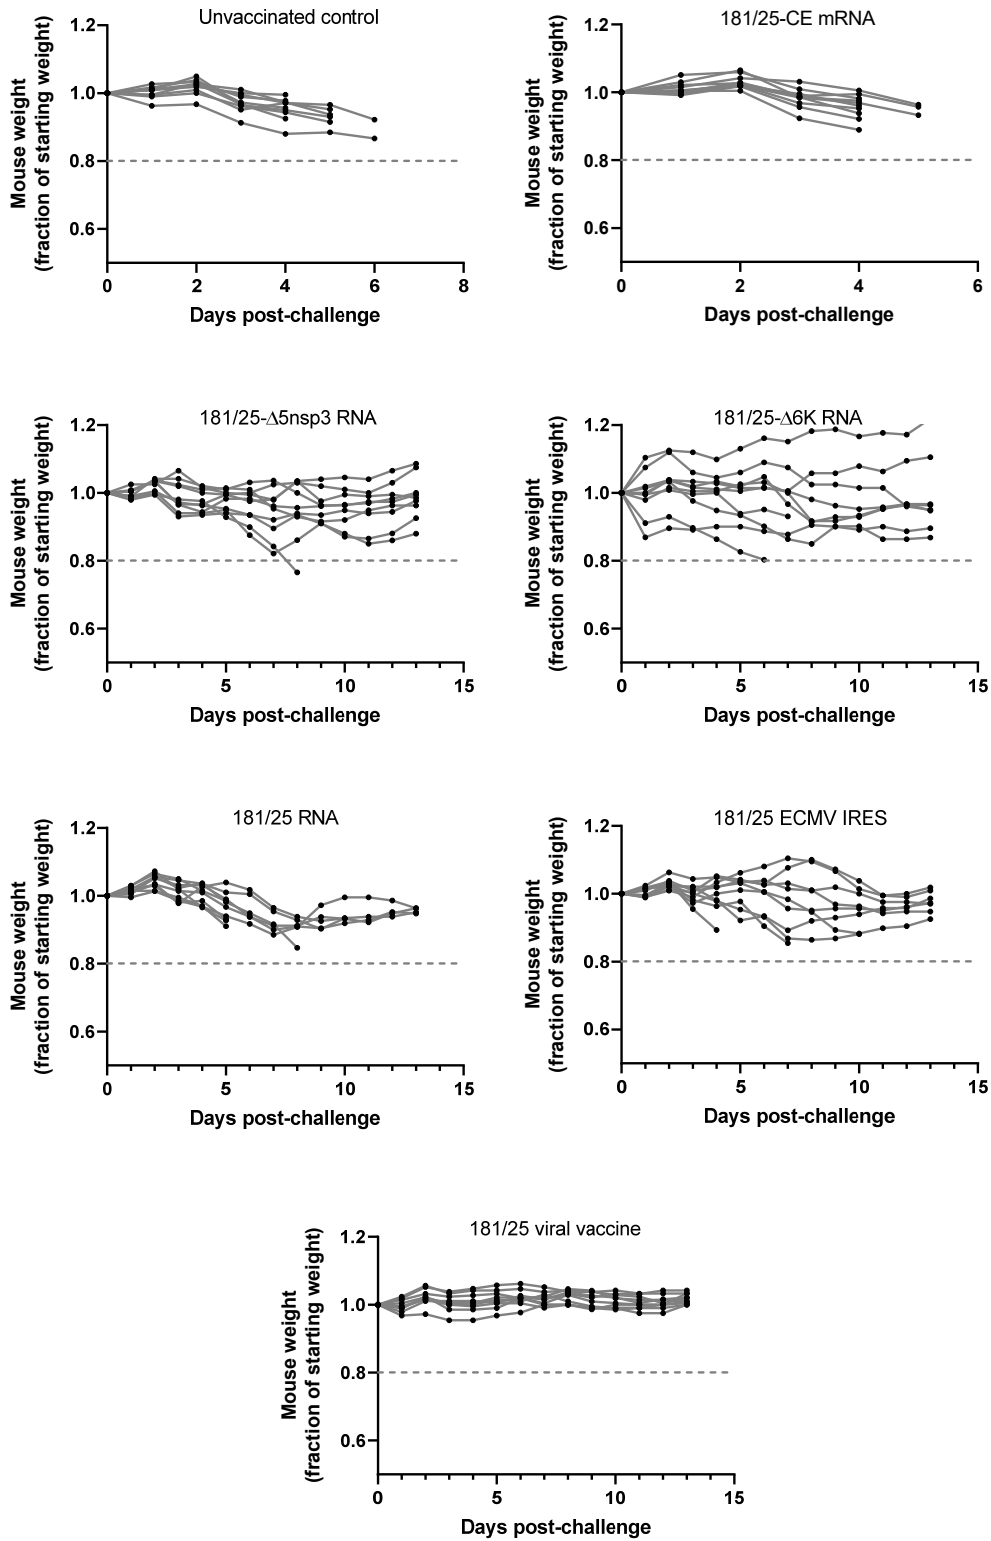

**Figure S2:** Vaccinated and control C57Bl/6 mouse body weights post-challenge with CHIKV-LR corresponding with Figure 3 challenge study, normalized to each mouse's initial body weight. Dashed lines represent 20% body weight loss criterion for early euthanasia.

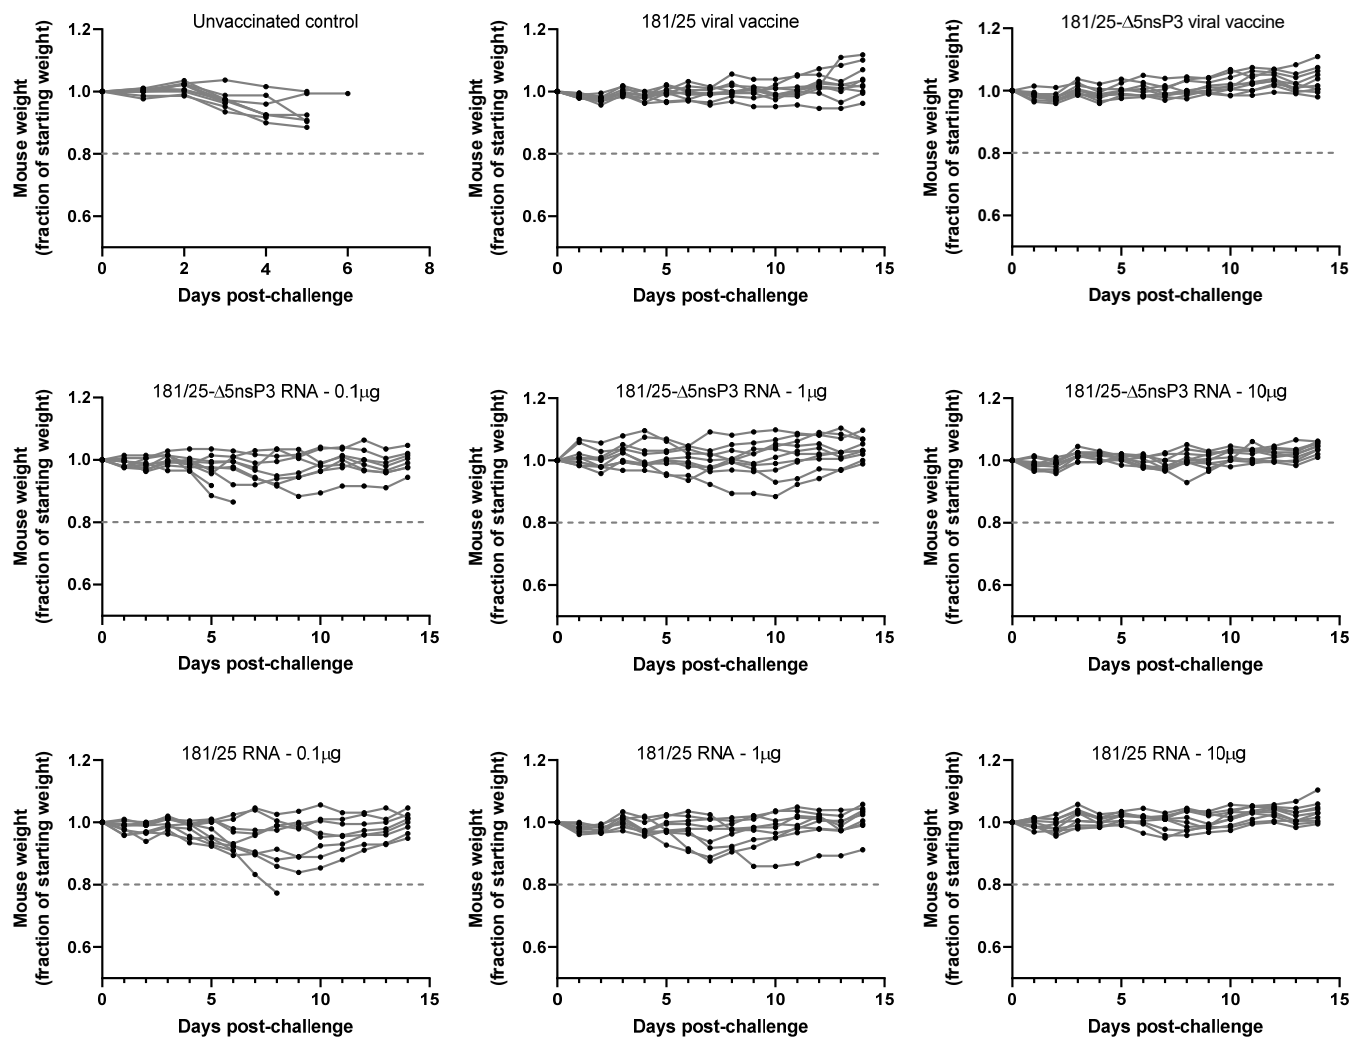

**Figure S3:** Vaccinated and control C57Bl/6 mouse body weights post-challenge with CHIKV-LR corresponding to challenge study in Figure 4, normalized to each mouse's initial body weight. Dashed lines represent 20% body weight loss criterion for early euthanasia.
